# Supplementary material
Source: PubMed Central journal article supplement (PMC9388625)
Supplement: 41467_2022_32573_MOESM3_ESM.pdf [file 41467_2022_32573_MOESM3_ESM.pdf]

**Supplementary Code 1:** R code allowing to reproduce the results of the study
